# Supplementary material for: Highly Porous Carbon Flakes Derived from Cellulose and Nickel Phosphide Heterostructure towards Efficient Electrocatalysis of Oxygen Evolution Reaction
Source: MDPI journal article supplement (doi:10.3390/molecules29020352), 2024-01-10
Supplement: s1 [file s1]

## Supplementary Information

# Highly Porous Carbon Flakes Derived from Cellulose and Nickel Phosphide Heterostructure towards Efficient Electrocatalysis of Oxygen Evolution Reaction

Ewa Mijowska <sup>1,2,\*</sup>, Karolina Pietrusewicz <sup>1</sup> and Klaudia Maślana <sup>1,2</sup>

<sup>1</sup> Department of Nanomaterials Physicochemistry, Faculty of Chemical Technology and Engineering, West Pomeranian University of Technology, Piastow Ave. 45, 70-311 Szczecin, Poland

<sup>2</sup> Center for Advanced Materials and Manufacturing Process Engineering (CAMMPE), West Pomeranian University of Technology, 70-310 Szczecin, Poland

\* Correspondence: emijowska@zut.edu.pl

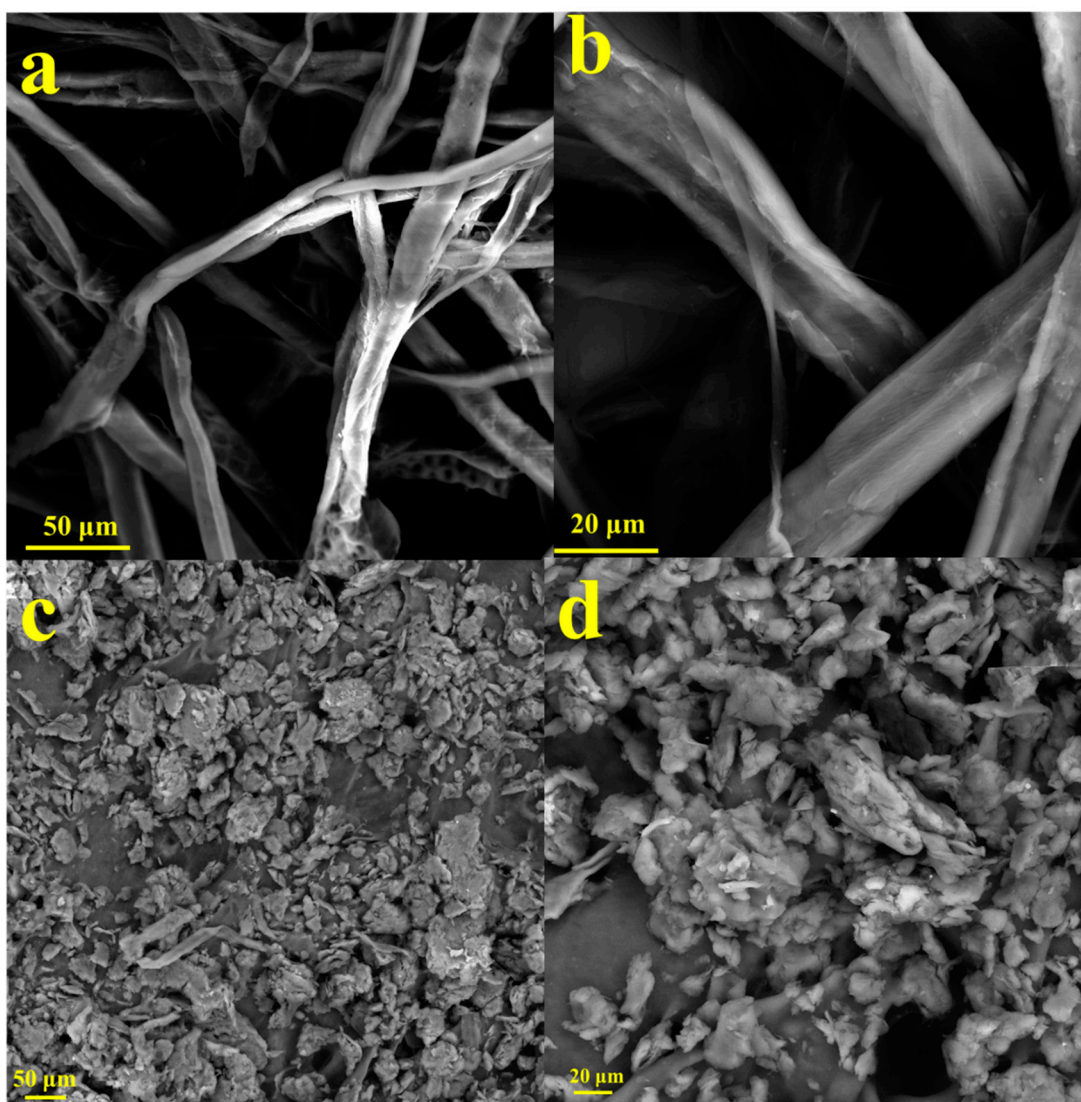

**Figure S1.** SEM images of pure cellulose fibers (a,b) and cellulose fibers after the ball-milling process (c,d).

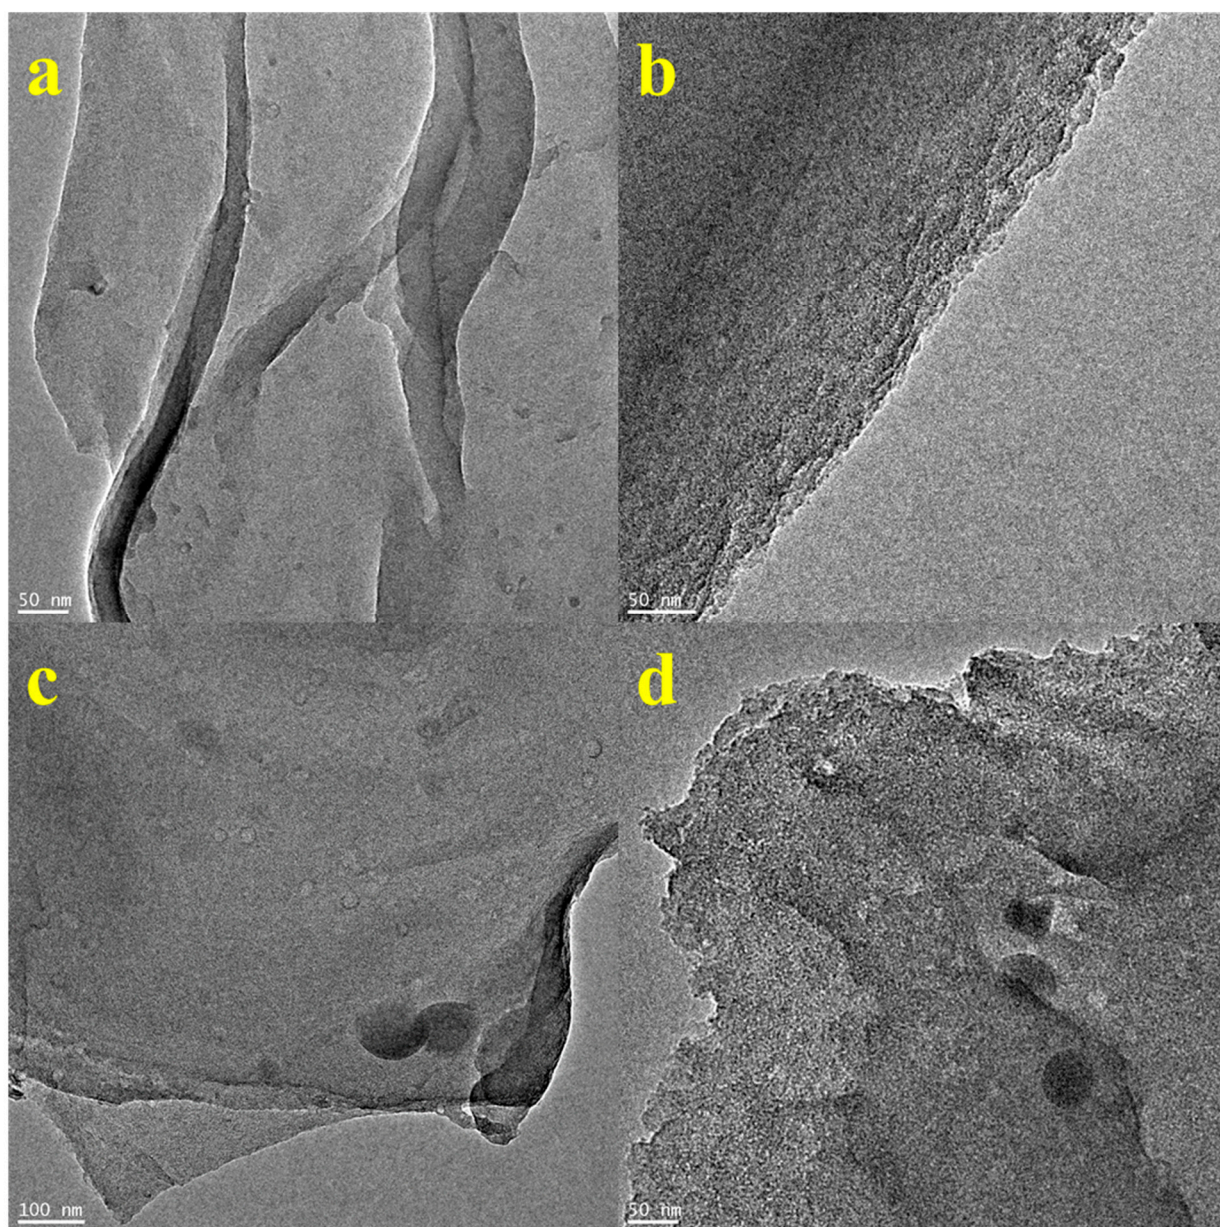

**Figure S2.** TEM images of (a) cel\_carb\_650, (b) cel\_carb\_750, (c) cel\_carb\_850, and (d) cel\_carb\_950.

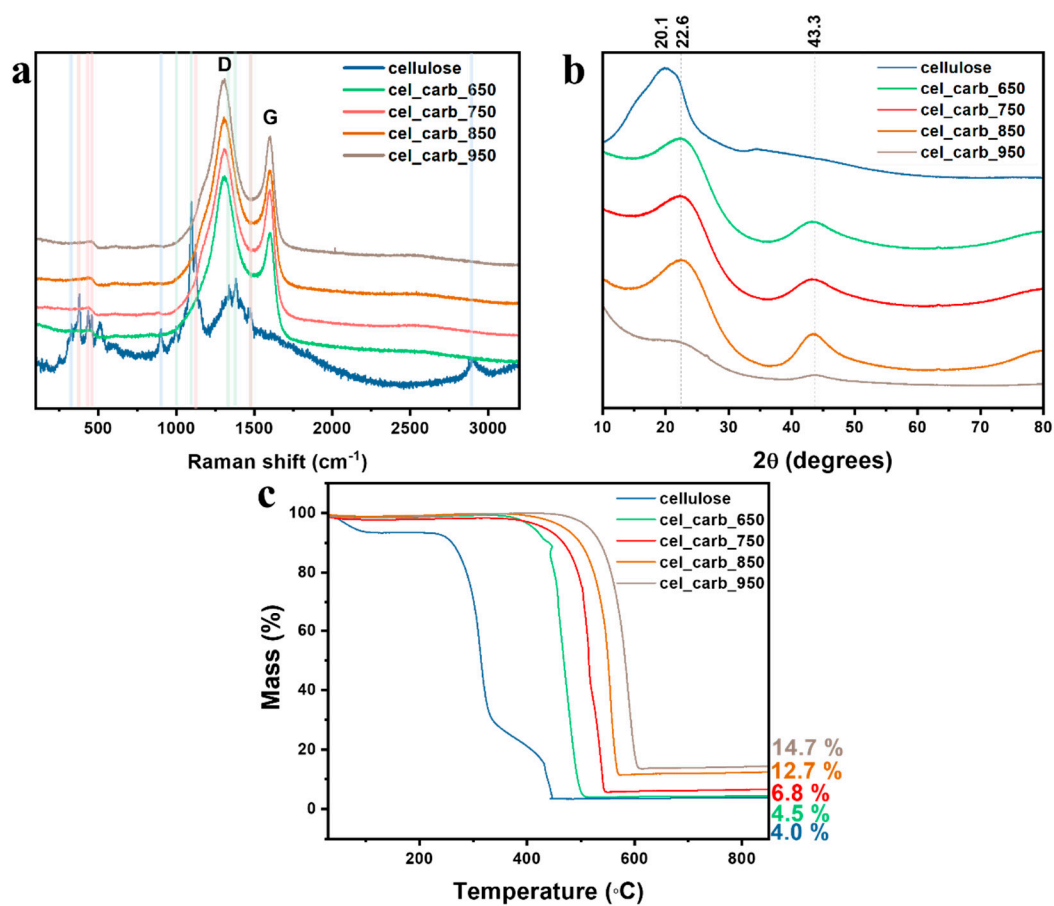

**Figure S3.** (a) Raman spectra, (b) XRD patterns, and (c) TGA patterns of cellulose and carbonized cellulose with different temperatures.



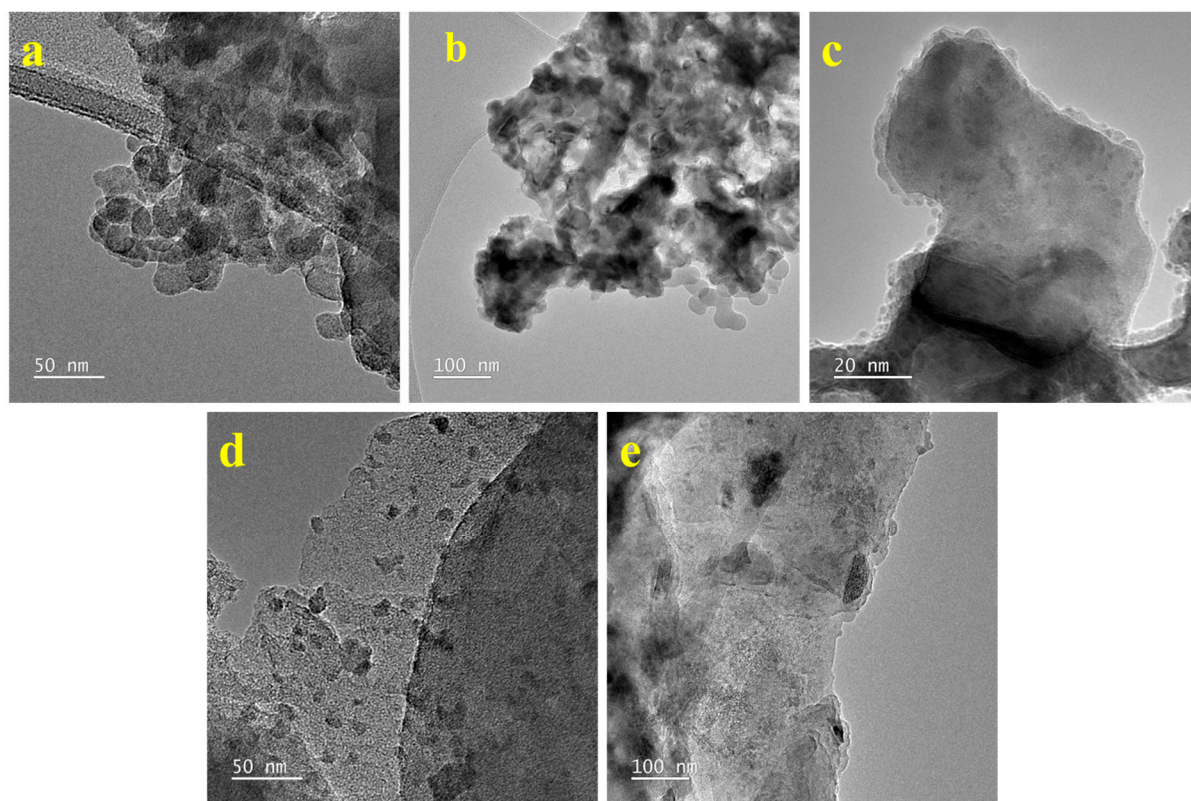

**Figure S4.** TEM images of (a)  $\text{Ni}_{12}\text{P}_5$ \_cel\_100:1, (b)  $\text{Ni}_{12}\text{P}_5$ \_cel\_10:1, (c)  $\text{Ni}_{12}\text{P}_5$ \_cel\_1:1, (d)  $\text{Ni}_{12}\text{P}_5$ \_cel\_1:10, and (e)  $\text{Ni}_{12}\text{P}_5$ \_cel\_1:100.

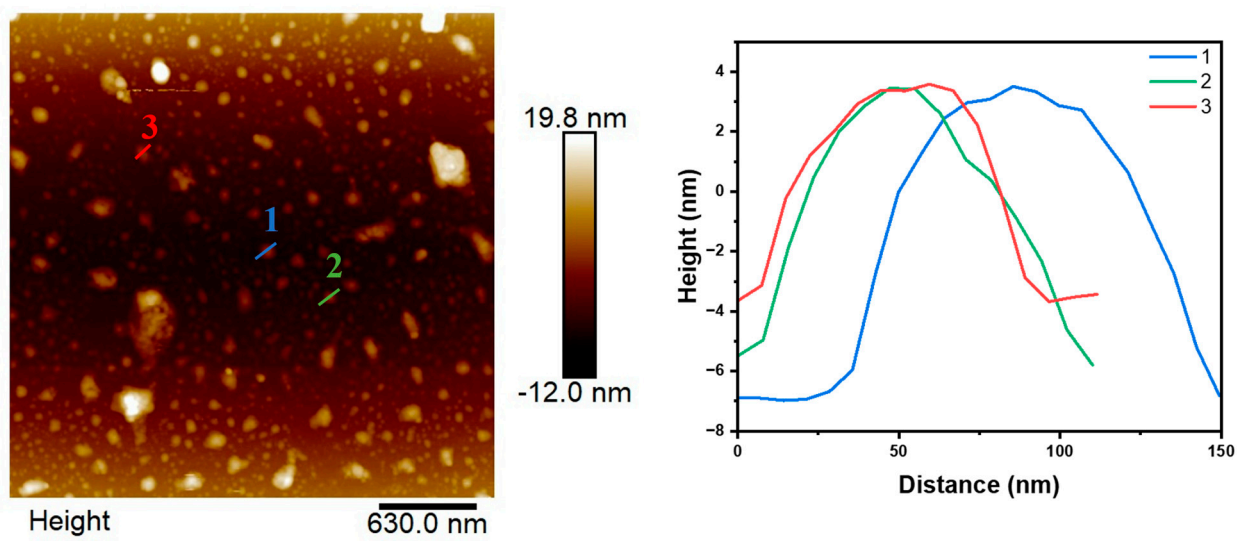

**Figure S5.** AFM image of  $\text{Ni}_{12}\text{P}_5$ \_cellulose\_100:1 and corresponding height profile.

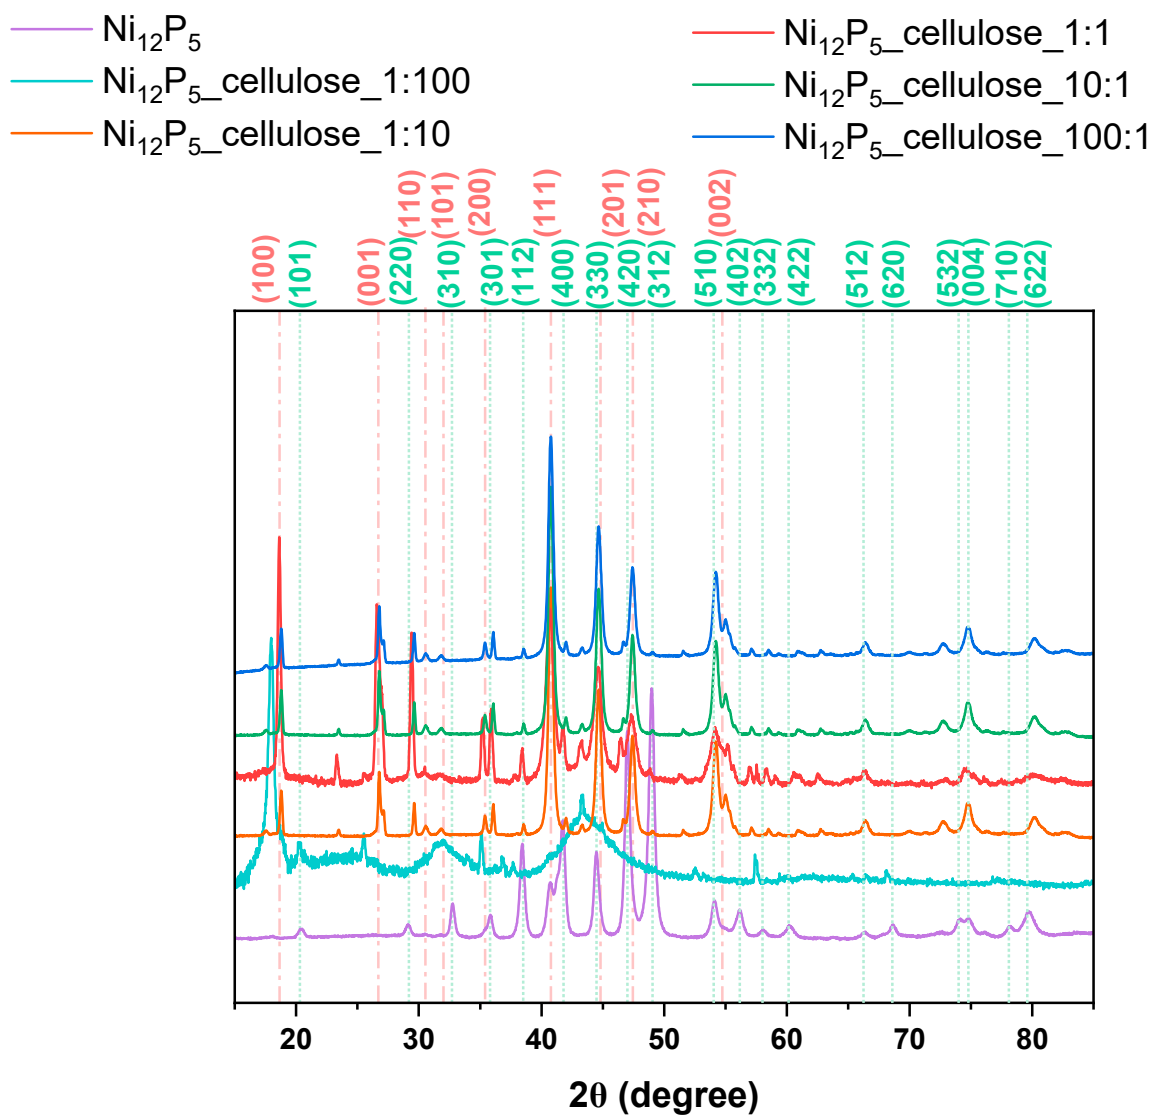

**Figure S6.** XRD patterns of  $\text{Ni}_{12}\text{P}_5$  and composites of  $\text{Ni}_{12}\text{P}_5_{\text{cellulose}}$  with different ratios.

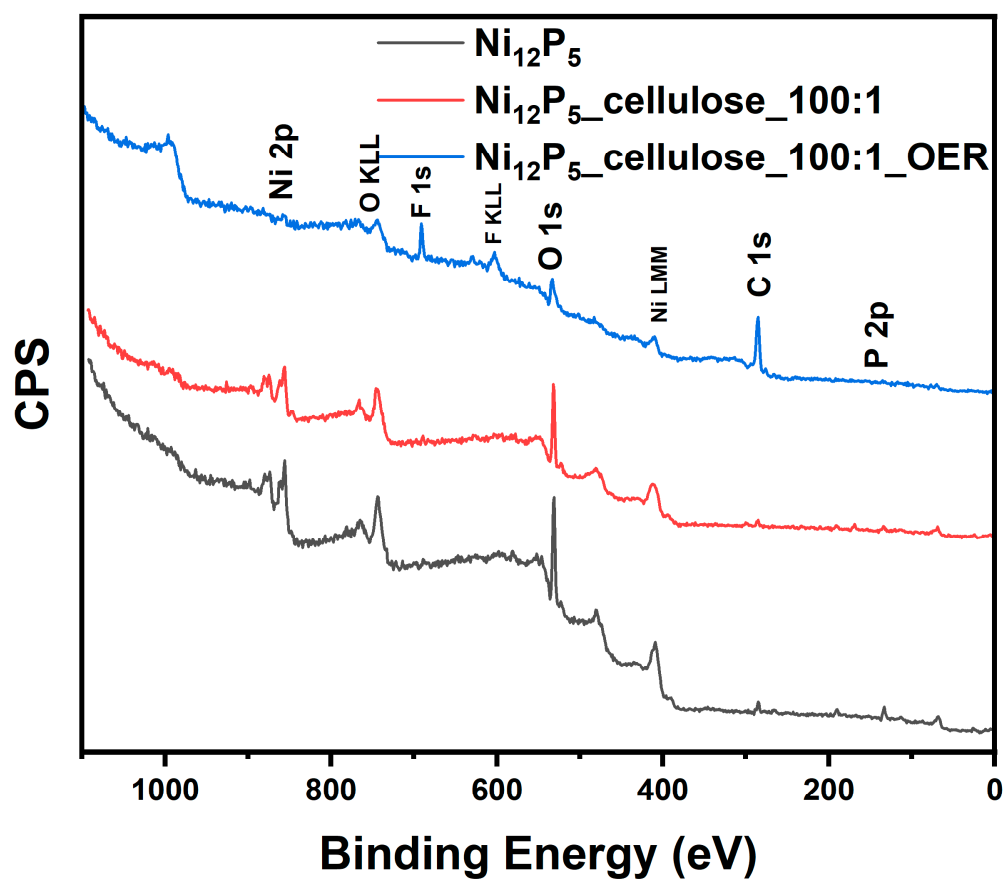

**Figure S7.** XPS survey scans of  $\text{Ni}_{12}\text{P}_5$ ,  $\text{Ni}_{12}\text{P}_5_{\text{cellulose\_100:1}}$ , and  $\text{Ni}_{12}\text{P}_5_{\text{cellulose\_100:1\_OER}}$ .



**Table S1.** I<sub>D</sub>/I<sub>G</sub> ratio values and BET specific surface area of cellulose after the carbonization with different temperatures.

| <i>Sample</i>       | <b>I<sub>D</sub>/I<sub>G</sub> ratio</b> | <b>Specific surface area<br/>(m<sup>2</sup>/g)</b> |
|---------------------|------------------------------------------|----------------------------------------------------|
| <i>cel_carb_650</i> | 1.229                                    | 301 m <sup>2</sup> /g                              |
| <i>cel_carb_750</i> | 1.309                                    | 342 m <sup>2</sup> /g                              |
| <i>cel_carb_850</i> | 1.192                                    | 374 m <sup>2</sup> /g                              |
| <i>cel_carb_950</i> | 1.484                                    | 589 m <sup>2</sup> /g                              |
